# Supplementary material for: Obtaining and Characterization of an Interspecific Hybrid between Lilium callosum and ‘Snow Queen’ and Evaluation of the Botrytis Stress Response
Source: MDPI journal article supplement (doi:10.3390/plants13101376), 2024-05-15
Supplement: s1 [file s1]

**Table S1. Primers used for screening polymorphic SSR marker primers.**

| No. | Name         | Sequences (5'— 3')     | Name         | Sequences (5'— 3')    |
|-----|--------------|------------------------|--------------|-----------------------|
| 1   | ivflmre17-F  | GTAGGCGGGCTTTCTTG      | ivflmre17-R  | TGGCCTCCTGCTTACCTT    |
| 2   | ivflmre18-F  | GTCTCCCGCCCCGCCCT      | ivflmre18-R  | CCCCCAGACTATCCACAG    |
| 3   | ivflmre19-F  | CGTTGTCGCGGCTGCAG      | ivflmre19-R  | CCACCGCAACGCCACTG     |
| 4   | ivflmre21-F  | TCTTCAGTTAGAGGCTTAGG   | ivflmre21-R  | CTAATAGGCAAGATTTACGAC |
| 5   | ivflmre26-F  | GATGGGGCAGGCATGGTG     | ivflmre26-R  | AGTGAGGAGGACGGGGAGG   |
| 6   | ivflmre28-R  | TTGATTGCATTTTTGGGTCTC  | ivflmre28-R  | TTGATTGCATTTTTGGGTCTC |
| 7   | ivflmre30-F  | CATCTCCGGCCAAATTGCAT   | ivflmre30-R  | CCCCCACCGCCGAACAAT    |
| 8   | ivflmre67-F  | GCTGGTCGCCATTTTTTAG    | ivflmre67-R  | CTCTCCCTTCACCTTCTCG   |
| 9   | ivflmre73-F  | TCTAAATAAGAAGCCACCA    | ivflmre73-R  | GGAATCACGAGAGATACCCA  |
| 10  | ivflmre107-F | TGTAACCCTTGACATAACCAT  | ivflmre107-R | ATAGCCCTATATCCTGTCACT |
| 11  | ivflmre108-R | ACCGGTCGGTCGAGAAGAT    | ivflmre108-R | ACCGGTCGGTCGAGAAGAT   |
| 12  | ivflmre110-F | TTCTCTCATGGCCTCCTATT   | ivflmre110-R | ACTTTGCATCGATGGTTACC  |
| 13  | ivflmre112-F | TAGGGTTTTTCTGTCTCTCC   | ivflmre112-R | AACTGTCTCCATATGCGTCG  |
| 14  | ivflmre114-F | AACTACCACTCTTCATCGCTC  | ivflmre114-R | GGCTTCTCTTTTTTATTCTGC |
| 15  | ivflmre116-F | CTCGGTGTAAATCCTGACGC   | ivflmre116-R | TCCCCCTCTTATGAGTACG   |
| 16  | ivflmre117-F | CATCCACACACCAACACCT    | ivflmre117-R | TCCACGACCACCGACTAGC   |
| 17  | ivflmre123-F | GTCGGTGATGGACGGTTCT    | ivflmre123-R | TTGCTCGGATACATGAAAAC  |
| 18  | ivflmre124-F | GCCTCAGATCCGTTCTACAT   | ivflmre124-R | TCTCCACCATAAGGGTTCTG  |
| 19  | ivflmre173-F | CGGCTTCTTTCACTCCTATCTC | ivflmre173-R | CCAAACCCAGGAAAGAGG    |
| 20  | ivflmre176-F | AGATCGGGGGAGCATGTCAG   | ivflmre176-R | GGCGGAGGTAGAGATCGAGG  |
| 21  | ivflmre177-F | GGTCGTTTCTCTTCATTGTT   | ivflmre177-R | CAAAGATGGAAATAAACTCG  |
| 22  | ivflmre178-F | CAACAATGGCATCACCAAT    | ivflmre178-R | GGAGGATGGAGTTGAAGACG  |
| 23  | ivflmre180-F | CACCGCAACGCCGAGCAG     | ivflmre180-R | GAAGGTGAGGACGGCGAGGG  |

|    |              |                         |              |                         |
|----|--------------|-------------------------|--------------|-------------------------|
| 24 | ivflmre181-F | GGAGGATGGATGCCGATACC    | ivflmre181-R | CCCACATCGTATCCGAGAAGA   |
| 25 | ivflmre182-F | CCTGGGTGCAGTCTTGGGAG    | ivflmre182-R | CGCCATTGCCTTAGGGTTTC    |
| 26 | ivflmre183-F | TCATCCTCCACCGCTGTCTC    | ivflmre183-R | ATTGGGGGTGGAAACTGAGG    |
| 27 | ivflmre189-F | CATTTAATCCTCGTTATTCAC   | ivflmre189-R | GTGTAAAAGCAACATGGTCG    |
| 28 | ivflmre193-F | GTTGCAGGTTGTGAGGTGTT    | ivflmre193-R | ATGTTTTTCGTATGCACCTTG   |
| 29 | ivflmre197-F | GGGTCCGACTCTCCCTCTTC    | ivflmre197-R | ACACCACAAACCCAACCCTAC   |
| 30 | ivflmre203-F | CTCCACAGAGGTCCCCACAA    | ivflmre203-R | GTTCCCAACGCACCCCCACAC   |
| 31 | ivflmre205-F | CTCTATTTCCCTCCCGGTCT    | ivflmre205-R | GCTGAGATGAGCCAGACAAG    |
| 32 | ivflmre286-F | ACCAGTATCACCTTGGCACC    | ivflmre286-R | CCAAAGCAGGCACAGAAACT    |
| 33 | ivflmre287-F | TGCATCAAATCGCACATGTTAG  | ivflmre287-R | TGGACCCACTTGCCATCTTC    |
| 34 | ivflmre295-F | GCACCATCTGCGGAAACCTA    | ivflmre295-R | ACCGGCAGCGACTTGGACT     |
| 35 | ivflmre303-F | GATGTAATATCTTAATGCCTGTG | ivflmre303-R | ACTTGGCGGTGGTCACGG      |
| 36 | ivflmre304-F | GATGGAAAGCATTCACGGCA    | ivflmre304-R | CTCATTCACAATAAACTGATCTT |
| 37 | ivflmre305-F | CCTCGGCATCGGAGAACTCA    | ivflmre305-R | GAAGCGGCTGGTGAAGAAGA    |
| 38 | ivflmre310-F | GCGGAGATGGTGTGATTTTC    | ivflmre310-R | TCCTCCTCTCTAGTCCTGCTC   |
| 39 | ivflmre314-F | TTTCTCCCCTGCTGAAGTGG    | ivflmre314-R | CCAACAACGAGCAACCCATC    |
| 40 | ivflmre315-F | TGAGCCGTAATCGGAAGCC     | ivflmre315-R | ACAACCCTCAGAGACTTCAATG  |
| 41 | ivflmre318-F | CAGTTTTTATTGGCAACAGAT   | ivflmre318-R | GTTAATGACTCAACGGCAGA    |
| 42 | ivflmre551-F | CACCCAAATCAGCCAAATCC    | ivflmre551-R | TGTCATTGCTCCAAGAGAAGG   |
| 43 | ivflmre558-F | CTCATTGTCCGAAAGCTC      | ivflmre558-R | CCAGTCATTCTCTTCCT       |
| 44 | ivflmre560-F | GATGTAGAGTCGGGGCT       | ivflmre560-R | CAAGAGTCCCCACACCATC     |
| 45 | ivflmre563-F | CTCCATTCTCTCCAAACTCTC   | ivflmre563-R | CAAATATCAGCATGAACCAGC   |
| 46 | ivflmre570-F | TCTCCTTCTCCAACCATGA     | ivflmre570-R | AATTCTCGTCCAGCAAAAAG    |
| 47 | ivflmre576-F | ATGGTGCCGATGTTGACG      | ivflmre576-R | CCAAACCCTATCTCATCCAAT   |
| 48 | ivflmre577-F | TTCCTTCGCATGTCCACC      | ivflmre577-R | AATCTCAGCTATTACCCACAG   |

|    |              |                        |              |                       |
|----|--------------|------------------------|--------------|-----------------------|
| 49 | ivflmre578-F | CAAATATGTGTGCGAACAGATG | ivflmre578-R | CCTTCCCTTCTCCCTTTCT   |
| 50 | ivflmre580-F | GATGGGCGGTTGCTTCTA     | ivflmre580-R | AAGCCGTGGAGGAAGAGG    |
| 51 | ivflmre582-F | CCGGCAATAGCTGAGATC     | ivflmre582-R | GTTGGTCCCGTTGATTCT    |
| 52 | ivflmre583-F | AAAAGCAGAGCAGAGAATTG   | ivflmre583-R | CGAGACGAAGAGCAACCAC   |
| 53 | ivflmre590-F | TCGCTTCTCCTTTCTTTGAT   | ivflmre590-R | GGTGCGGAAGGTTGTGAG    |
| 54 | ivflmre676-F | CTCTCGCCCAGGGACCAC     | ivflmre676-R | CCACGGAACCGCCAGATA    |
| 55 | ivflmre720-F | GAAGAAGTAACATGGTGGTCA  | ivflmre720-R | CATAGCAACTGCGGTAAGAG  |
| 56 | ivflmre724-F | ACCCATTGGAAGTGCCT      | ivflmre724-R | CTGGTTCGCTGATTCTCG    |
| 57 | ivflmre726-F | GGGTCTCAGTCAAGCACA     | ivflmre726-R | GCGGCATCTATAAATCGTC   |
| 58 | ivflmre730-F | TGTTAGCAGCGGCATCGG     | ivflmre730-R | ACTCTTCGGCACGGCATT    |
| 59 | ivflmre732-F | GCAGACCTCAAGCGATAA     | ivflmre732-R | GAACCCCTGGAGCTGATC    |
| 60 | ivflmre733-F | GGCCCTCTTTGTTGTTCT     | ivflmre733-R | CTGTCCTCCGCTTCCATT    |
| 61 | ivflmre736-F | TCCACCCACTTACCACCT     | ivflmre736-R | TGAGACTGTTTCAGGCATC   |
| 62 | ivflmre739-F | GTCCGCATAATACCAACC     | ivflmre739-R | TTGATGATAACGAAAGAGGA  |
| 63 | ivflmre740-F | CTACTCTGCTGTCCCTCCGTG  | ivflmre740-R | CAAAAGTCCAGGCAAATCA   |
| 64 | ivflmre743-F | TAGATGTGAATGTGCAGACTT  | ivflmre743-R | CAATTGACTGCGATGCTACT  |
| 65 | ivflmre745-F | CAGTTCAACGGACGTGGA     | ivflmre745-R | GCTGATAATCGGTGAACTCC  |
| 66 | ivflmre747-F | CAGATTTCTTGTGAGCCCTA   | ivflmre747-R | CAGTTCTACATCATTCCCTTC |
| 67 | ivflmre748-F | ACTTCTGCCATCTGAGCCT    | ivflmre748-R | CGCCTCTCATGAGCACGA    |
| 68 | ivflmre752-F | GCTTTGCTGAGGCATCGT     | ivflmre752-R | TGGTCCCAAACGGGTATT    |
| 69 | ivflmre755-F | CTCTGCATCTTAGGTTGGC    | ivflmre755-R | AAGAGGGCATAAACGGAAT   |
| 70 | ivflmre758-F | AAAACCCTGGGCACTGGA     | ivflmre758-R | TTGGACGGCATAACCTTG    |
| 71 | ivflmre759-F | CGCCGATTCAAAAATTACA    | ivflmre759-R | GCCGTCTTGCTTGCCTAT    |
| 72 | ivflmre761-F | GGGAGTTACCTTAAGATGTCA  | ivflmre761-R | GCTTCAGTCCCTCCAGTA    |
| 73 | ivflmre763-F | GAGCCCGAAATTCCAGAT     | ivflmre763-R | TCCTTCCGCTAACTCAAT    |

|    |              |                       |              |                        |
|----|--------------|-----------------------|--------------|------------------------|
| 74 | ivflmre765-F | CGCGTCGTCGTTCTGGTC    | ivflmre765-R | AAATCTTCCTTGGCATCCG    |
| 75 | ivflmre769-F | GTCTTATCACGTGGGCCG    | ivflmre769-R | GCAAGAACCTGATTTGATGAA  |
| 76 | ivflmre774-F | TGAAGATGGTAAACCAAGCG  | ivflmre774-R | CATGGTTTCTCGGCCTCC     |
| 77 | ivflmre777-F | ACCCCTACCGAAGTTCCC    | ivflmre777-R | CAAGGCGGTACTTCTGTTC    |
| 78 | ivflmre787-F | CCTAAGAAAGGACCACCAAT  | ivflmre787-R | GTAAGGGATCAAACACTAAGC  |
| 79 | ivflmre789-F | TTTCCCAGGTGGCAGAGC    | ivflmre789-R | TGCCGCGTTCAACCTCTA     |
| 80 | ivflmre790-F | GGTAAAACTGGGTGAACTCG  | ivflmre790-R | AGAGCCCAGAGCTATCACAG   |
| 81 | ivflmre791-F | GGGCTTCTCGAATCCGTAC   | ivflmre791-R | ATCCTGGTGGGTCTCCGG     |
| 82 | ivflmre792-F | GATAGGAGTCTGAGGCTGTG  | ivflmre792-R | TTGTGACTTGGTAGCGGC     |
| 83 | ivflmre793-F | AACCTAATCCTACTCAAGCTG | ivflmre793-R | TCTGACACTGCCGAGGTAT    |
| 84 | ivflmre794-F | CTGCTGAGCGAGGAAATG    | ivflmre794-R | GTAAAAGCATGGTTCTTGAGGT |
| 85 | ivflmre795-F | TGCTCCGTACTCCACTATCT  | ivflmre795-R | CGCCGAAGCATAATCACT     |
| 86 | ivflmre796-F | AGTCCCAGATCCAATTCTGA  | ivflmre796-R | GGTGACCGGGGACGTATT     |
| 87 | ivflmre800-F | AGAATTACCTGATCTGCGC   | ivflmre800-R | TCATCCAATCTTTGCCATAT   |
| 88 | ivflmre802-F | ACCTCCGATTGCCATATAC   | ivflmre802-R | GAACCTGTGCGTTTCATACTC  |
| 89 | ivflmre839-F | CGGACTCAGACCACAGCT    | ivflmre839-R | TTCGGTTCTCGGCTTGTT     |
| 90 | ivflmre841-F | ATCAGAGTACATCCCACAGC  | ivflmre841-R | ATTGTGACTAAATCCGACTAAC |
| 91 | ivflmre844-F | CAACTTCATTGTGCGGCATC  | ivflmre844-R | AGAAGCCGTATCCCGACT     |
| 92 | ivflmre879-F | TCCAGAACAGGAGGTATGC   | ivflmre879-R | AGCCTGTAAACCGAACCC     |
| 93 | ivflmre885-F | TGAACTAAATCTCGTCCTGC  | ivflmre885-R | GATCTTGATCAGAAACAGGAG  |
| 94 | ivflmre886-F | CACAGTGACAAGAGGAACATT | ivflmre886-R | TGATTGTTTCGCAGGTTATG   |
| 95 | ivflmre890-F | CAGGTCTGTCCTCGTTCC    | ivflmre890-R | CCACAGCCCTAAGATTACAC   |
| 96 | ivflmre894-F | AGGCATCATAGGAGGTGG    | ivflmre894-R | TCCGTCCAAGGAAAGTGA     |
| 97 | ivflmre895-F | AATGCACAACGCACTCAA    | ivflmre895-R | AGAGTGTGAAGGTTATGCATC  |
| 98 | ivflmre897-F | AAGGCAGACTTCCGACAT    | ivflmre897-R | CCACCAAGCCATTCATTC     |

**Table S2. SSR primers for amplifying polymorphic bands from the two parents.**

| No.       | Name              | Female parent <sup>#</sup> | Male parent <sup>*</sup> |
|-----------|-------------------|----------------------------|--------------------------|
| 1         | ivflmre18         | √                          | —                        |
| <b>2</b>  | <b>ivflmre19</b>  | √                          | √                        |
| 3         | ivflmre30         | —                          | √                        |
| <b>4</b>  | <b>ivflmre67</b>  | √                          | √                        |
| <b>5</b>  | <b>ivflmre108</b> | √                          | √                        |
| 6         | ivflmre117        | —                          | √                        |
| 7         | ivflmre173        | —                          | √                        |
| 8         | ivflmre180        | —                          | √                        |
| <b>9</b>  | <b>ivflmre181</b> | √                          | √                        |
| <b>10</b> | <b>ivflmre197</b> | √                          | √                        |
| 11        | ivflmre203        | —                          | √                        |
| 12        | ivflmre286        | —                          | √                        |
| <b>13</b> | <b>ivflmre303</b> | √                          | √                        |
| <b>14</b> | <b>ivflmre304</b> | √                          | √                        |
| 15        | ivflmre318        | —                          | √                        |
| <b>16</b> | <b>ivflmre560</b> | √                          | √                        |
| <b>17</b> | <b>ivflmre563</b> | √                          | √                        |
| <b>18</b> | <b>ivflmre580</b> | √                          | √                        |
| 19        | ivflmre583        | √                          | —                        |
| 20        | ivflmre590        | —                          | √                        |
| 21        | ivflmre724        | √                          | —                        |
| 22        | ivflmre732        | √                          | —                        |
| <b>23</b> | <b>ivflmre740</b> | √                          | √                        |
| <b>24</b> | <b>ivflmre745</b> | √                          | √                        |
| 25        | ivflmre748        | —                          | √                        |
| 26        | ivflmre752        | √                          | —                        |
| 27        | ivflmre765        | √                          | —                        |
| 28        | ivflmre787        | —                          | √                        |
| 29        | ivflmre790        | √                          | —                        |
| <b>30</b> | <b>ivflmre791</b> | √                          | √                        |
| 31        | ivflmre792        | —                          | √                        |
| 32        | ivflmre839        | √                          | —                        |
| <b>33</b> | <b>ivflmre844</b> | √                          | √                        |
| 34        | ivflmre879        | √                          | —                        |

Note: the bold means primers amplifying polymorphic bands from the two parents, # means primers amplifying polymorphic bands from the female parent, \* means primers amplifying polymorphic bands from the male parent.
