# Supplementary material for: Obtaining and Characterization of an Interspecific Hybrid between Lilium callosum and ‘Snow Queen’ and Evaluation of the Botrytis Stress Response
Source: MDPI journal article supplement (doi:10.3390/plants13101376), 2024-05-15
Supplement: s1 [file s1]

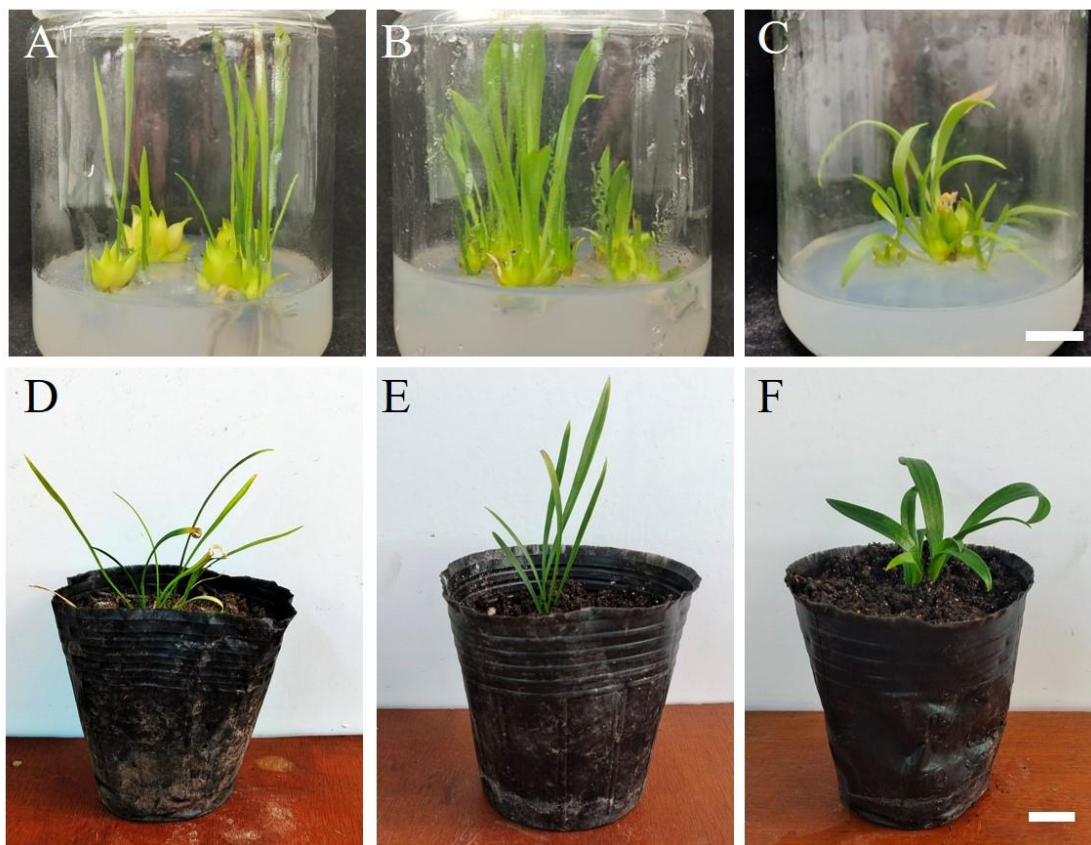

**Figure S1. Morphological features of tissue-cultured and open-field-generated plants.** A, B, C: Representative seedlings of *L. callosum*, LC×SQ-01 and 'Snow Queen', respectively, cultured for 60 days in medium; the bars represent 1 cm. D, E, F: Representative seedlings of *L. callosum*, LC×SQ-01 and 'Snow Queen', respectively, grown for 60 days in open fields; the bars represent 1 cm.

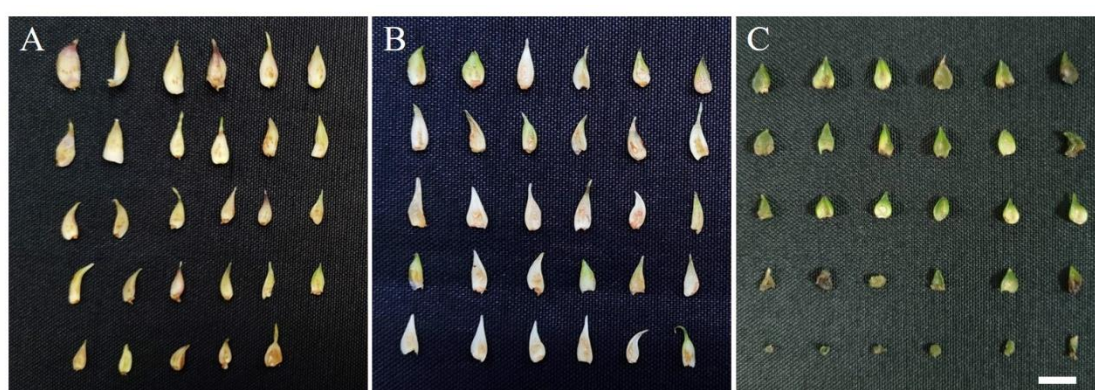

**Figure S2. Comparisons of *Botrytis* stress response in the scales of the LC×SQ-01 hybrid and the parents.** A, B, C: Representative images of the scales from *L. callosum*, LC×SQ-01 and 'Snow Queen' after inoculation with *B. cinerea* at 9 days (9 dpi), respectively. The bars represent 1 cm (A-C).
